# Supplementary material
Source: publisher figshare collection journal article supplement (https://karger.figshare.com/articles/dataset/_/7156433)

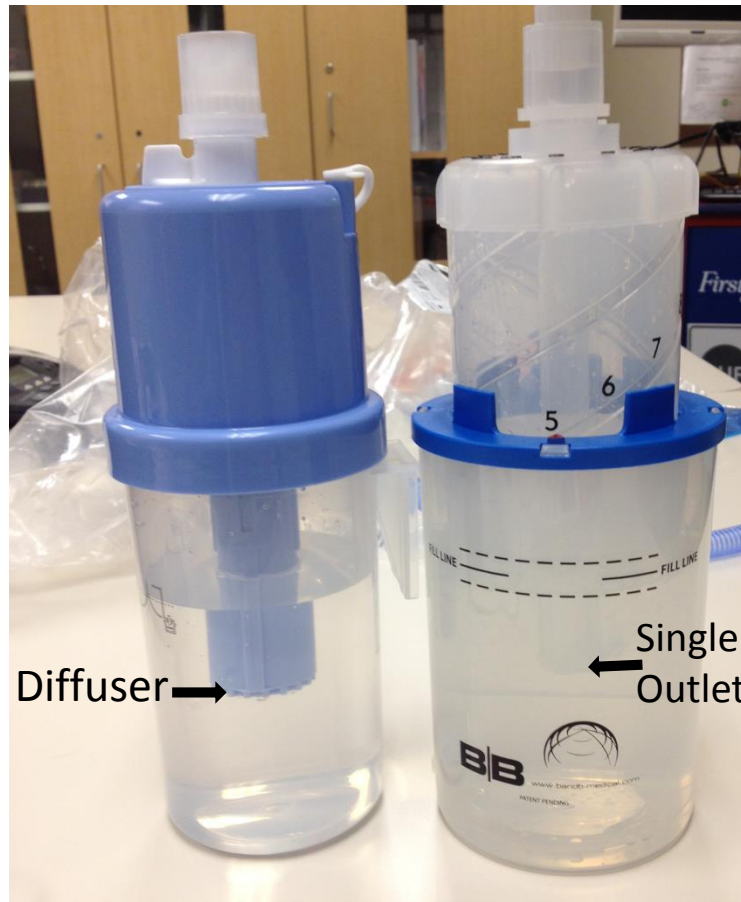

**BabiPlus©**

**B&B  
Bubblers©**

Supplement: Supplementary file 1 [file 1]
